# Supplementary material
Source: PubMed Central journal article supplement (PMC2791580)
Supplement: 0906053106_0906053106SI.pdf [file 0906053106_0906053106SI.pdf]

# Supporting Information

Holland et al. 10.1073/pnas.0906053106

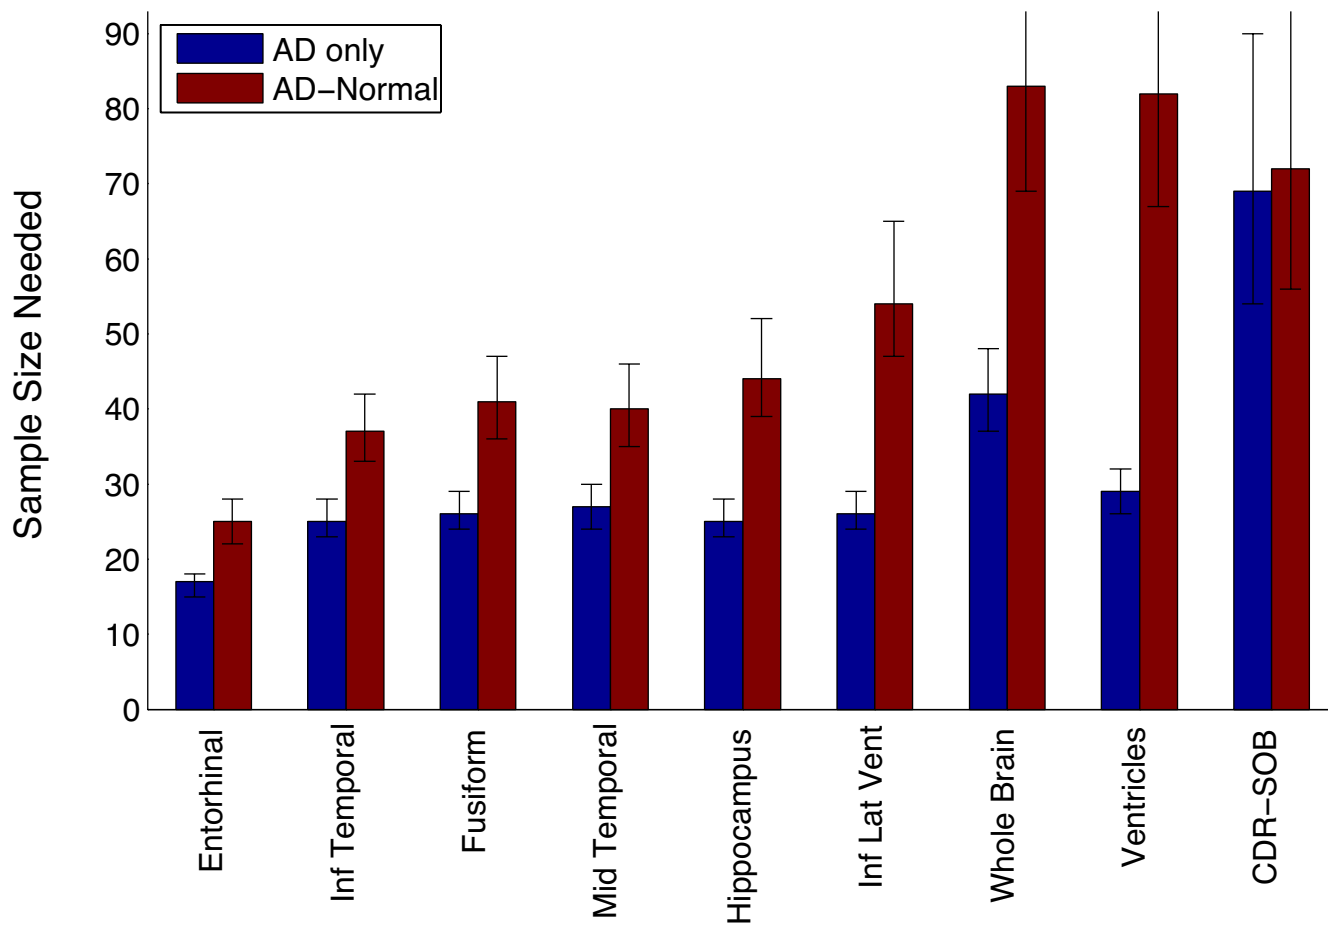

**Fig. S1.** Sample size estimates for AD from a linear random-effects model (not incorporating random slopes). The bars, with 95% confidence intervals, indicate the expected number of subjects needed per arm to detect a 25% reduction in rate of change at the  $P < 0.05$  level with 80% power, assuming a 24-month trial with scans every 6 months. Results for Model T are in blue, and results for Model D are in red; numerical values are in [Table S1](#).

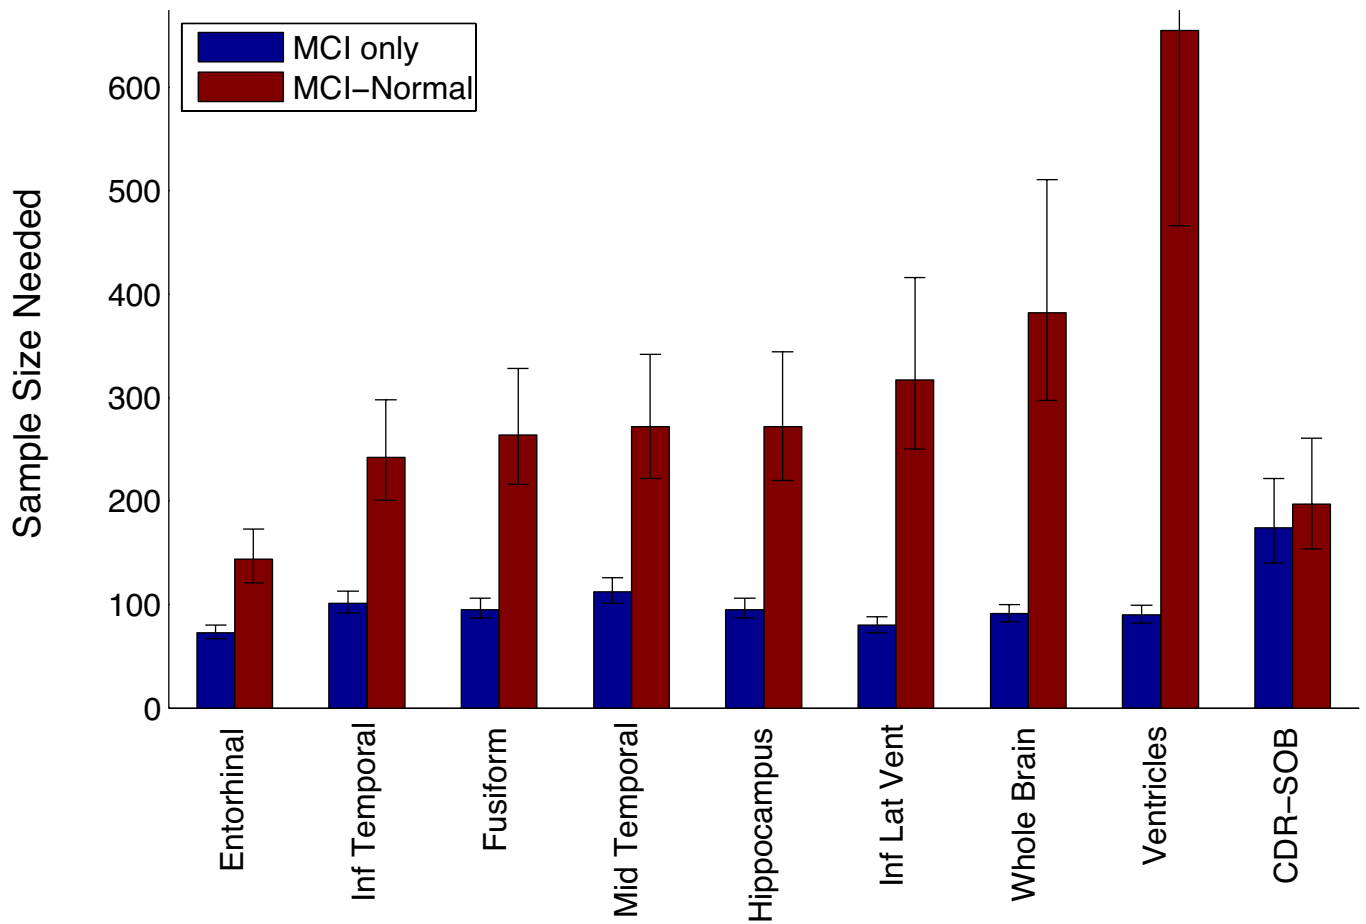

Fig. S2. Sample size estimates for MCI from a linear random-effects model (not incorporating random slopes). See Fig. S1 for description. Numerical values are in Table S2.



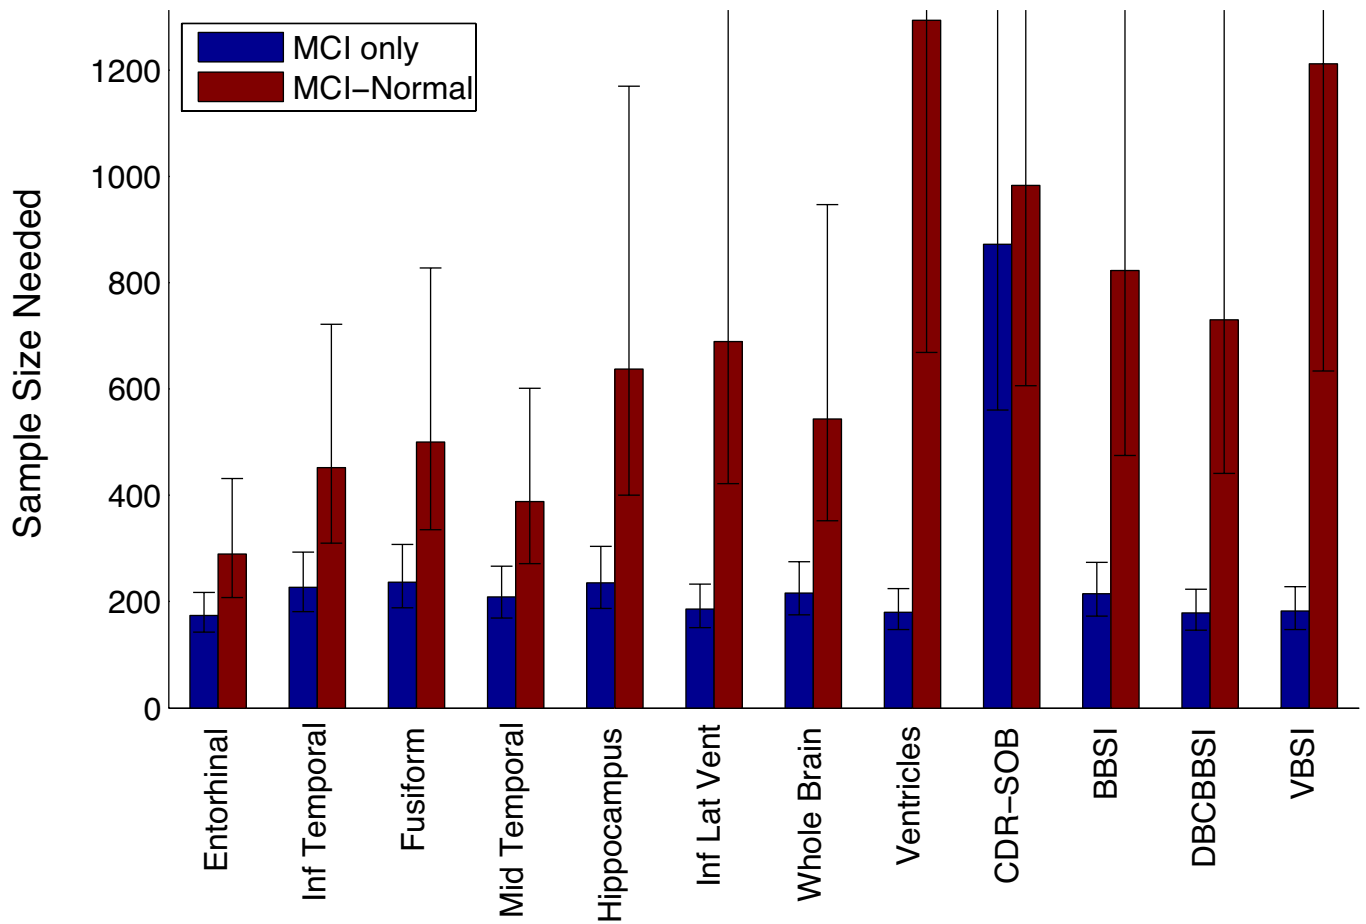

Fig. S4. Sample size estimates for MCI from a linear mixed-effects model with random slopes, comparing the current method, a cognitive measure, and BSI. See Fig. S3 for description. Numerical values are in Table S4.





**Table S3. Sample size estimates (N) and annualized percent change for AD: Comparison with BSI**

| Measure               | AD only N         | AD-HC N           | AD % change*        | HC % change*        |
|-----------------------|-------------------|-------------------|---------------------|---------------------|
| Entorhinal            | 82 [67 103]       | 117 [88 164]      | -3.68 [-4.07 -3.28] | -0.61 [-0.86 -0.36] |
| Inf temporal          | 109 [86 144]      | 159 [117 227]     | -3.54 [-4.00 -3.09] | -0.60 [-0.78 -0.42] |
| Fusiform              | 114 [89 150]      | 169 [123 247]     | -2.80 [-3.16 -2.43] | -0.51 [-0.66 -0.35] |
| Mid temporal          | 104 [82 135]      | 147 [109 208]     | -3.43 [-3.84 -3.00] | -0.55 [-0.72 -0.37] |
| Hippocampus           | 111 [87 146]      | 193 [137 294]     | -3.42 [-3.85 -2.98] | -0.83 [-1.04 -0.61] |
| Inf lat vent          | 110 [87 144]      | 263 [176 437]     | 14.18 [12.39 15.98] | 5.00 [4.00 6.01]    |
| Whole brain           | 182 [135 260]     | 308 [204 517]     | -1.49 [-1.73 -1.24] | -0.34 [-0.44 -0.25] |
| Ventricles            | 123 [95 163]      | 429 [259 839]     | 10.35 [8.97 11.73]  | 4.82 [4.05 5.58]    |
| CDR-SOB               | 478 [290 934]     | 500 [299 1000]    | 1.60 [1.14 2.05]    | 0.04 [-0.01 0.08]   |
| ADAS-Cog <sup>†</sup> | 624 [355 1,368]   | 473 [278 982]     | 4.08 [2.76 5.41]    | -0.60 [-1.15 -0.06] |
| MMSE <sup>†</sup>     | 1,056 [525 3,113] | 1,103 [533 3,502] | -2.29 [-3.25 -1.34] | -0.05 [-0.28 0.18]  |
| BBSI                  | 136 [105 184]     | 311 [202 539]     | 1.80 [1.55 2.05]    | 0.61 [0.47 0.75]    |
| DBCBSI                | 116 [91 153]      | 279 [186 464]     | 1.63 [1.42 1.84]    | 0.58 [0.46 0.69]    |
| VBSI                  | 98 [78 127]       | 303 [195 532]     | 8.81 [7.75 9.86]    | 3.79 [3.16 4.43]    |

Twelve-month study with 102 AD subjects and 130 healthy controls: comparison with boundary-shift integral methods. Values in brackets are 95% confidence intervals. BBSI, boundary shift integral from baseline; DBCBSI, differential bias corrected BSI from baseline; VBSI, ventricular BSI.

\*Annual percent change in volume for all entries except CDR-SOB, ADAS-Cog, and MMSE.

<sup>†</sup>Not shown in Fig. S3.
